# Supplementary material for: Drosophila Mpv17 forms an ion channel and regulates energy metabolism
Source: PubMed Central journal article supplement — iScience. 2023 Sep 16;26(10):107955. doi: 10.1016/j.isci.2023.107955 (PMC10558772; doi:10.1016/j.isci.2023.107955), 2023-09-16
Supplement: mmc1.pdf [file mmc1.pdf]

## **Supplemental information**

### **Drosophila Mpv17 forms an ion channel and regulates energy metabolism**

**Samantha Corrà, Vanessa Checchetto, Michele Brischigliaro, Chiara Rampazzo, Emanuela Bottani, Cristina Gagliani, Katia Cortese, Cristiano De Pittà, Marco Roverso, Diego De Stefani, Sara Bogialli, Massimo Zeviani, Carlo Viscomi, Ildiko Szabò, and Rodolfo Costa**

## Supplemental information

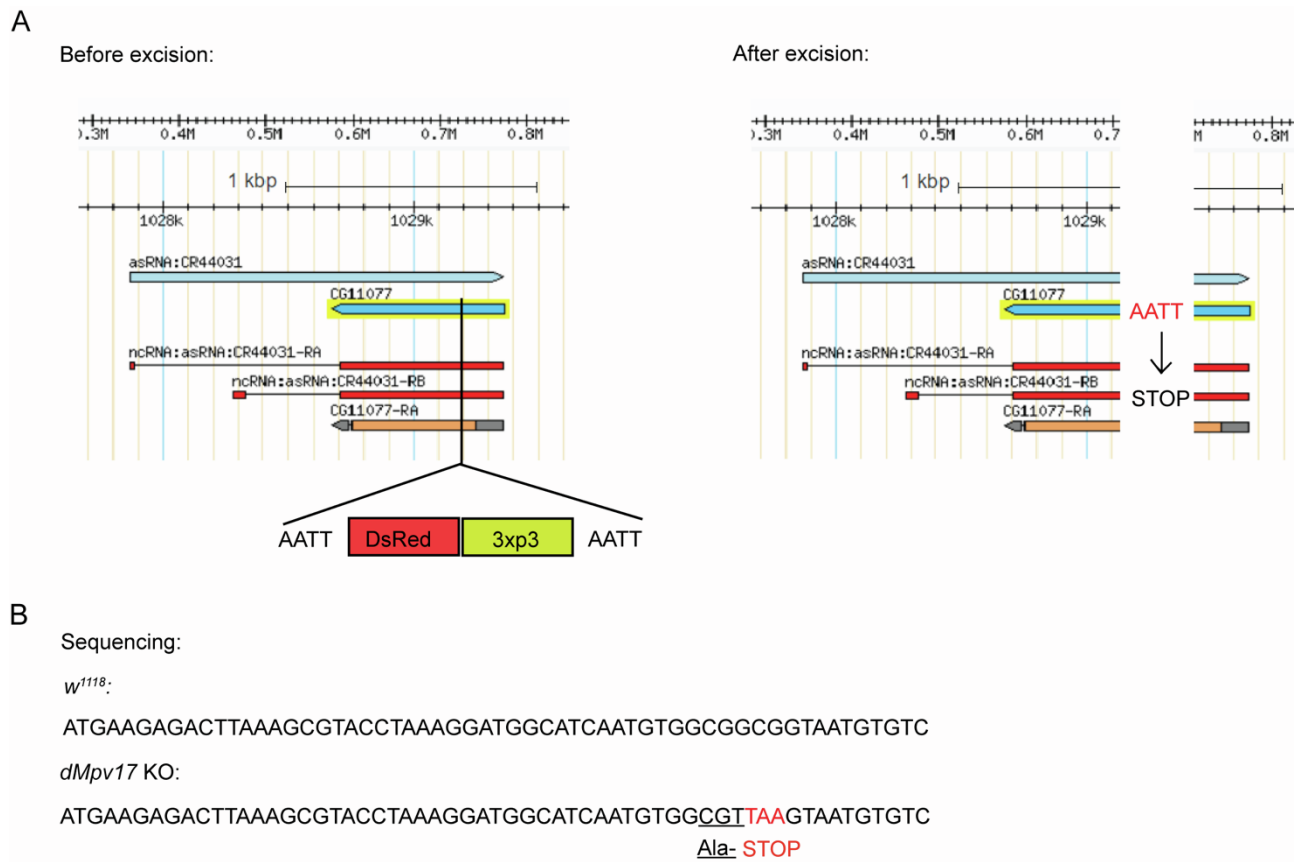

**Figure S1. Strategy for *Drosophila* *dMpv17* KO strain generation, Related to Figure 2.**

A) Genome editing map before and after pBac excision. Organization of the *dMpv17* locus and position of the insertion (left). Mutation after excision of the cassette (right). DsRed: discosoma red fluorescent protein; 3xP3: artificial promoter containing 3 *Mmus*\Pax6 homodimer binding sites. B) Comparison between wildtype and mutated *dMpv17* sequence.

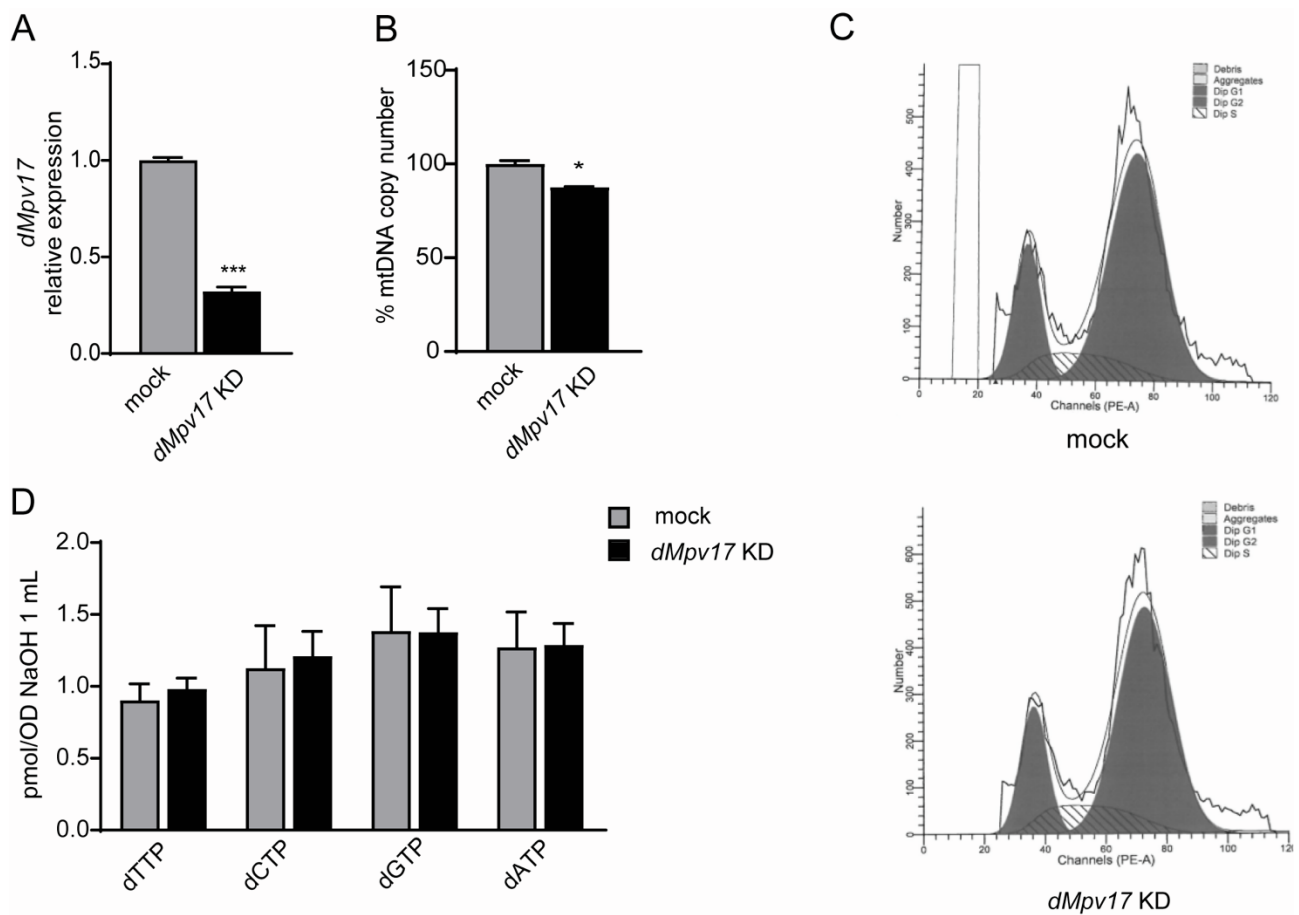

**Figure S2. Characterization of *dMpv17* KD in S2R+ cells, Related to Figure 2.**

A) Quantification of *dMpv17* mRNA. Error bars: SEM; \*\*\* $p < 0.001$  on unpaired, two-tailed Student's t test. B) Quantification of mtDNA. Error bars: SEM; \* $p < 0.05$  on unpaired, two-tailed Student's t test. C) Results of FACS analysis showing no difference in the percentage of cells in S-phase in *dMpv17* KD vs mock control cells. D) Quantification of mitochondrial nucleotide pools. Pool sizes are expressed as picomoles of dNTP/OD NaOH 1ml (mean  $\pm$  SEM from four independent experiments).

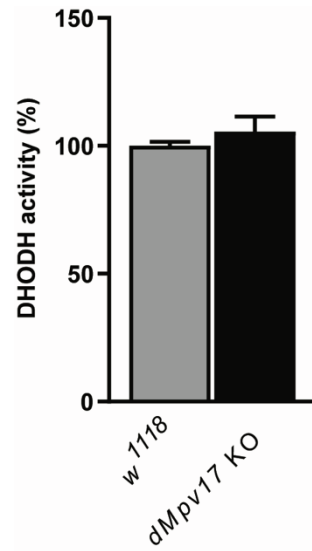

**Figure S3. DHODH activity upon dMpv17 deletion, Related to Figure 2.**

Percentage DHODH activity in mitochondria isolated from whole fly homogenates in *dMpv17* KO and control flies (mean±SEM).

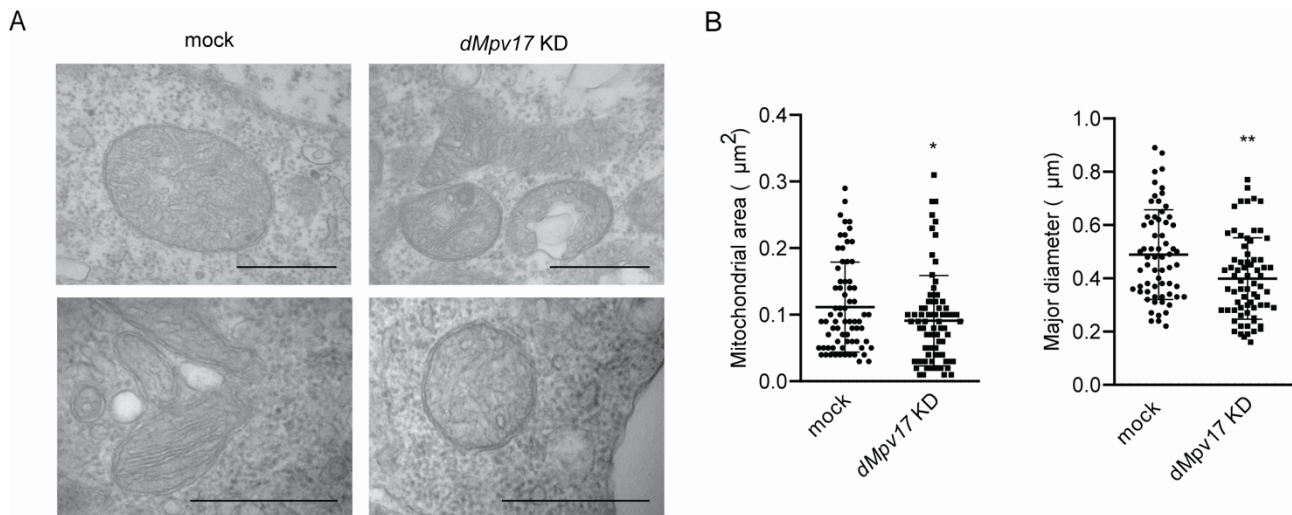

**Figure S4. Electron microscopy analysis in *dMpv17* KD S2R+ cells, Related to Figure 3.**

A) Representative TEM images of *dMpv17* KD and mock control S2R+ cells. Scale bar: 500 nm. B) Quantification of the mitochondrial area (mock:71, *dMpv17* KD: 76; error bars:  $\pm$ SEM, \* $p$ <0.05 on on unpaired, two-tailed Student's t-test) and major diameter (error bars:  $\pm$ SEM, \*\* $p$ <0.01 on unpaired, two-tailed Student's t-test).

Empty vector

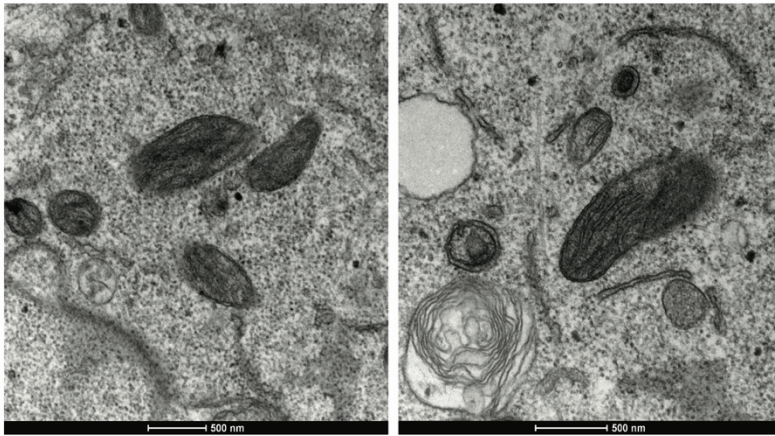

*dMpv17* OE

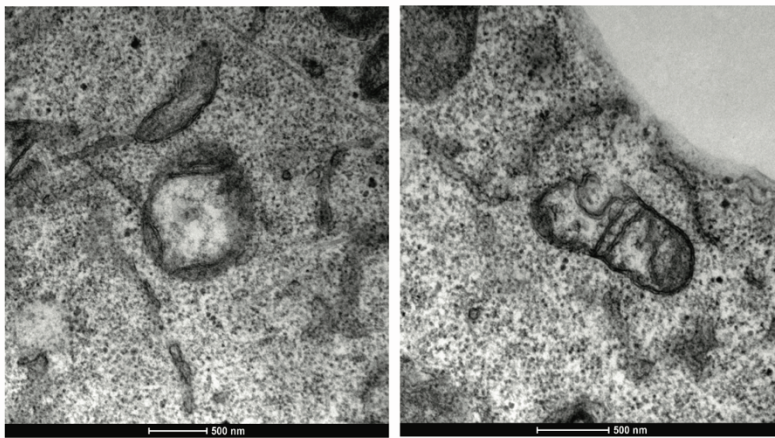

**Figure S5. Mitochondrial ultrastructure, Related to Figure 3.**

Representative TEM images of control (empty vector) and *dMpv17* over-expressing (*dMpv17* OE) S2R+ cells. *dMpv17* overexpression induced a severe alteration of mitochondrial morphology with organelle swelling and disappearance of cristae. Scale bar: 500 nm.

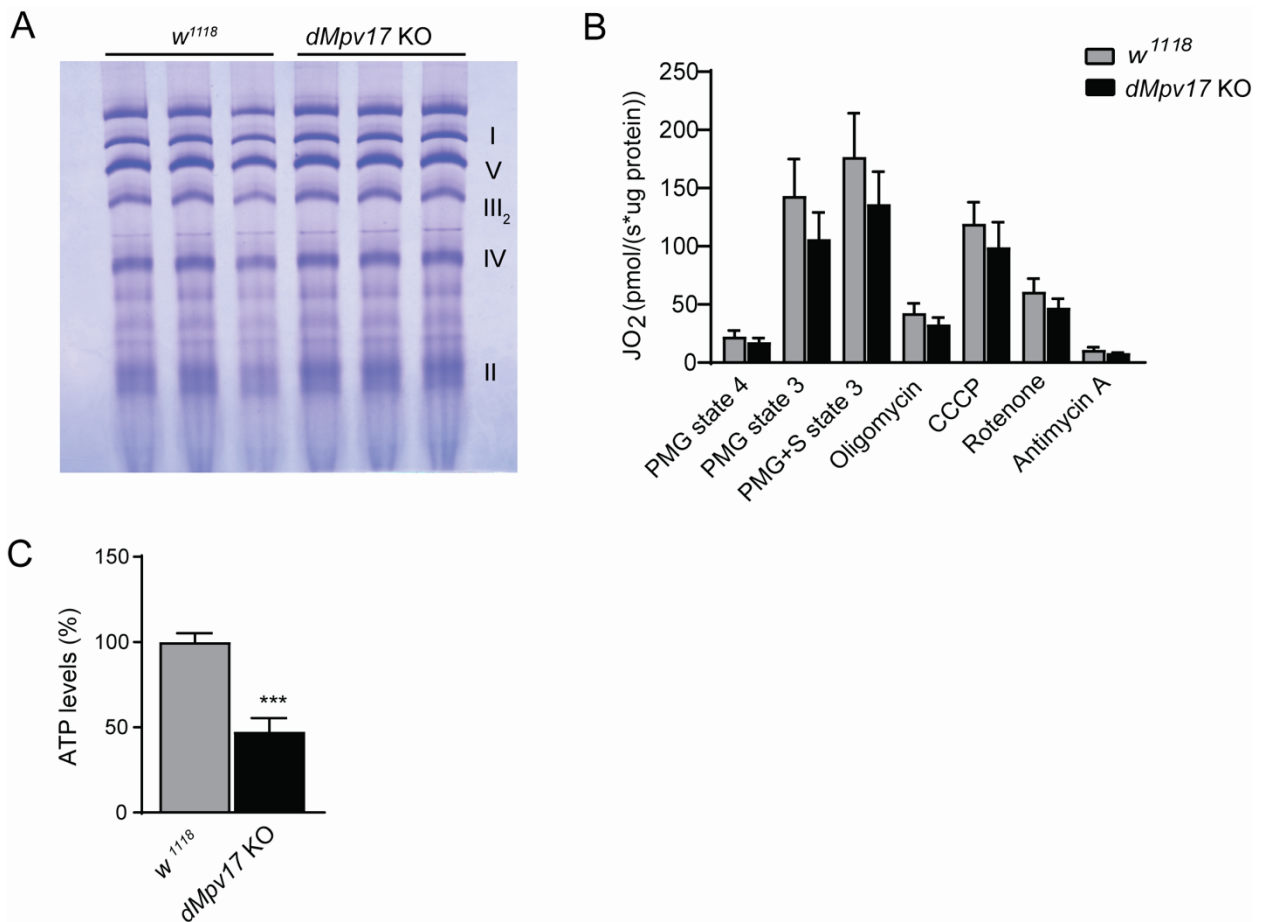

**Figure S6. Bioenergetic analysis of *dMpv17* KO flies, Related to Figure 4.**

A) 1D-BNGE analysis of mitochondria isolated from whole flies. B) OCR (mean±SEM) measured in homogenates of *dMpv17* KO (dark grey) and control (light grey) flies; no significant differences were detected. State 3 respiration was stimulated by the addition of Proline, Malate and Glutamate (PMG) and PMG+succinate (PMG+S), in the presence of ADP. LEAK-respiration was measured through the inhibition of ATP synthase with oligomycin. Maximal respiration was measured adding the uncoupler CCCP. C) ATP content in 20 day-old flies. Error bars: SEM; \*\*p<0.01 on unpaired, two-tailed Student's t-test.

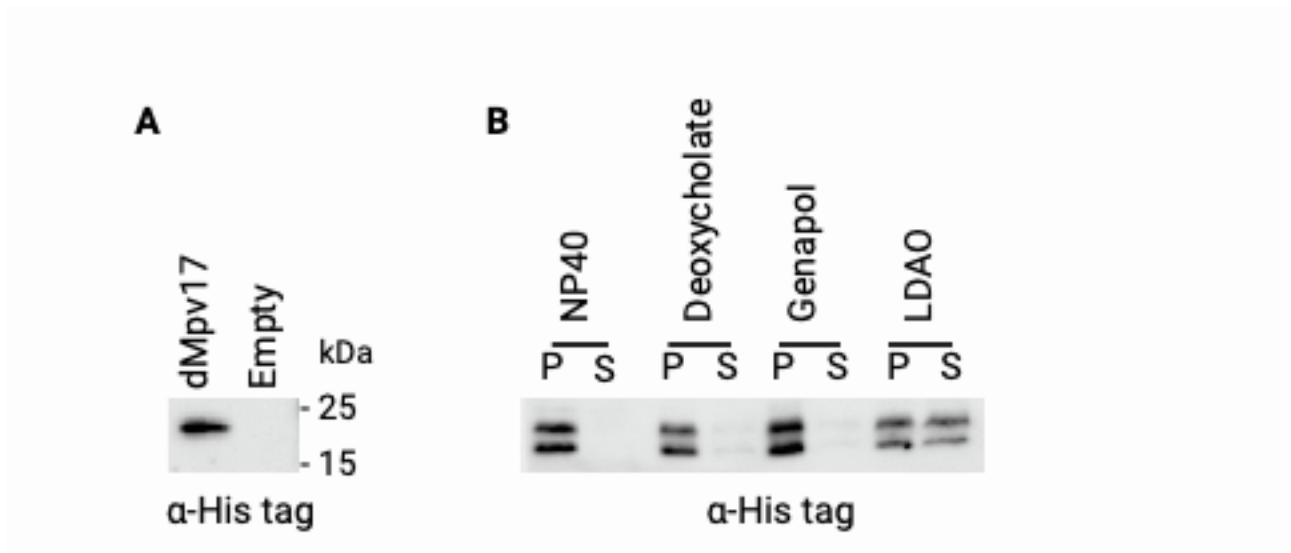

**Figure S7 Analysis of *dMpv17-his* expression, Related to Figure 5.**

A) Western blot immunovisualization of dMpv17-His with an antibody against the His tag; B) Solubilization analysis of dMpv17-His using different detergents. S: supernatant, P: pellet



## Electrophysiological Approach - Planar Lipid Bilayers

### 1 Prepare Bilayer chambers and Planar Lipid Bilayer

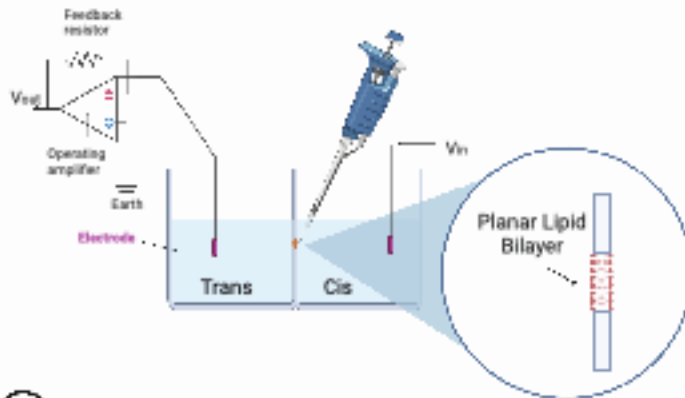

### 2 Add dMpv17 proteins in Cis chamber

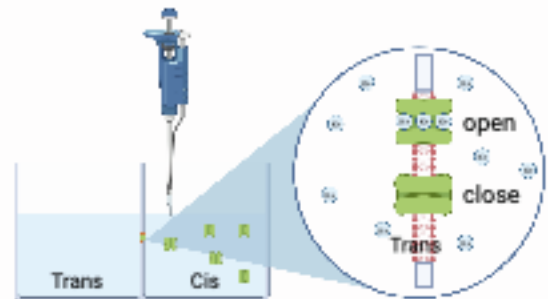

### 3 Signal acquisition

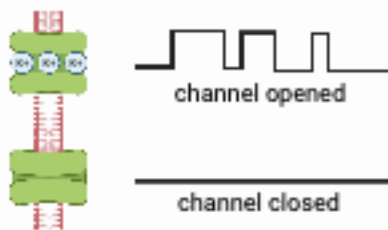

### 4 Data analysis

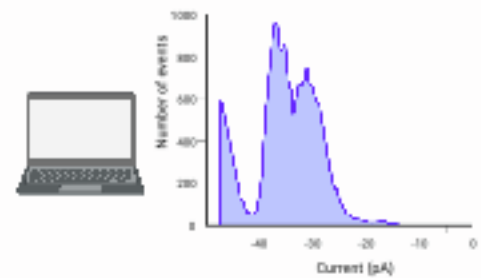

Figure S8. Schematic representation of the planar lipid bilayer technique, Related to Figure 5.

1) The bilayer chambers: lipid bilayers are painted on the hole in the middle of the cuvette. Silver-silver chloride electrodes are connected to each compartment (cis and trans) to obtain the ionic current that is amplified using a voltage-clamp amplifier; 2) Protein addition to the cis compartment, and representation of the incorporated ion channels; 3) The ion channel activity; 4) Data analyses.
